# Supplementary material
Source: PubMed Central journal article supplement (PMC5052509)
Supplement: mmc1.pdf [file mmc1.pdf]

**Biophysical Journal, Volume 111**

**Supplemental Information**

**Positive Quantitative Relationship between EMT and Contact-Initiated  
Sliding on Fiber-like Tracks**

**Daniel F. Milano, Robert J. Natividad, Yasuhiro Saito, Catherine Y. Luo, Senthil K. Muthuswamy, and Anand R. Asthagiri**

Supplemental Information

**1. Quantification of TGF $\beta$ -mediated morphological changes**

Contours of the bodies of cells treated with different doses and duration of TGF $\beta$  were manually outlined using Photoshop. Void regions where no cells were present were also outlined. Properties of these contoured regions-of-interest (ROI) were quantified using Matlab. From ROIs associated with cell bodies, the perimeter and area were quantified, and the shape factor was calculated as the  $\text{Perimeter}^2 / (4\pi \text{ Area})$ . A circle has a shape factor of 1, and shapes deviating from a circle have a shape factor greater than 1. Supplemental Table 1 summarizes the shape factor for cells left untreated or treated with different doses and duration of TGF $\beta$ .

| Treatment      | Shape Factor | 95% Confidence Interval |
|----------------|--------------|-------------------------|
| UC             | 1.42         | 0.08                    |
| 5 ng/ml (3d)   | 1.51         | 0.07                    |
| 5 ng/ml (6d)   | 1.63         | 0.10                    |
| 20 ng/ml (3d)  | 1.57         | 0.11                    |
| 20 ng/ml (12d) | 1.52         | 0.11                    |

**Supplemental Table 1.** Cells exhibit a more extended morphology following TGF $\beta$  treatment. The shape factor is higher among TGF $\beta$ -treated cells compared to untreated controls, consistent with an elongation of the cell body.

From ROIs associated with void regions, the void area was quantified, and the fraction of total surface area that was devoid of cells was calculated. The fold-change in the void fraction is depicted in Supplemental Figure 1. Longer exposure and higher doses of TGF $\beta$  yielded higher fold-change in void fraction, consistent with the observed loss of cell-cell contacts with greater TGF $\beta$  treatment.

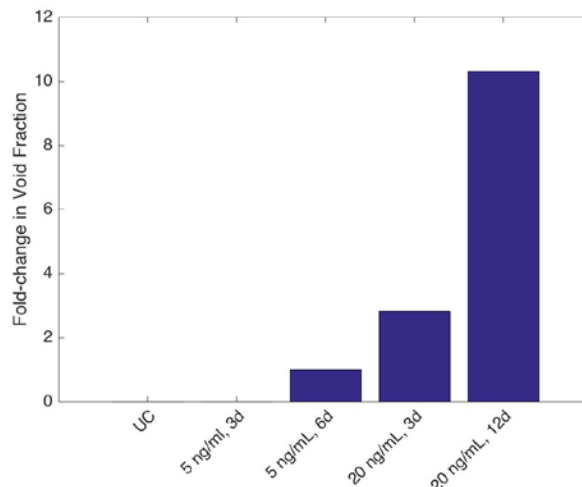

**Supplemental Figure 1.** Fold-change in void regions between cells. TGF $\beta$ -induced EMT results in loss of cell-cell contact. The amount of void areas between cells was quantified from a representative image of cells left untreated or treated with TGF $\beta$  at different doses

and duration. The untreated control and treatment with 5 ng/ml TGFβ for 3 d exhibited no void regions. For the other treatment conditions, the void fraction increased with higher exposure time and dose, with cells treated with 20 ng/ml TGFβ for 12 d exhibiting approximately 10-fold greater void regions than those treated with 5 ng/ml TGFβ for 6 d.

## 2. Upregulation of N-cadherin in response to TGFβ treatment

A characteristic marker of the mesenchymal state is the expression of N-cadherin. We assayed by Western blot the effect of TGFβ-mediated EMT on the expression level of N-cadherin (Supplemental Fig. 2). For both 5 ng/ml and 20 ng/ml of TGFβ, the level of N-cadherin increased gradually with time, and the final steady-state expression level of N-cadherin after 12 h of TGFβ treatment was clearly above the expression level in control untreated cells.

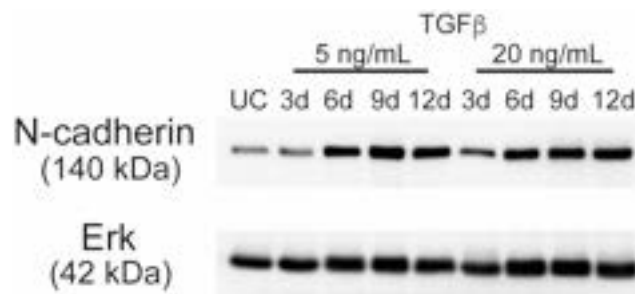

**Supplemental Figure 2.** N-cadherin expression was measured by Western Blot in TGFβ-treated and untreated (control) cells. Erk2 was probed as an equal-loading control.

## 3. Number of cell-cell collisions analyzed

In total, 7226 cell-cell encounters were analyzed across 50 combinations of 5 TGFβ treatment and 10 fiber-like micropattern widths. Supplemental Table 2 details the number of cell-cell collisions analyzed at each of the 50 conditions.

| Condition              | Width of fiber-like micropattern (μm) |     |     |     |     |     |     |     |     |     | Marginal total |
|------------------------|---------------------------------------|-----|-----|-----|-----|-----|-----|-----|-----|-----|----------------|
|                        | 6                                     | 9   | 12  | 15  | 18  | 21  | 24  | 27  | 30  | 33  |                |
| Untreated              | 38                                    | 74  | 103 | 117 | 117 | 95  | 112 | 125 | 112 | 112 | 1005           |
| TGFβ<br>5 ng/ml, 3 d   | 118                                   | 159 | 138 | 101 | 84  | 124 | 127 | 102 | 78  | 65  | 1096           |
| TGFβ<br>5 ng/ml, 6 d   | 168                                   | 202 | 207 | 155 | 185 | 202 | 249 | 211 | 185 | 193 | 1957           |
| TGFβ<br>20 ng/ml, 3 d  | 142                                   | 133 | 140 | 137 | 138 | 152 | 146 | 127 | 137 | 110 | 1362           |
| TGFβ<br>20 ng/ml, 12 d | 83                                    | 129 | 119 | 176 | 177 | 195 | 169 | 202 | 257 | 299 | 1806           |
| Marginal total         | 549                                   | 697 | 707 | 686 | 701 | 768 | 803 | 767 | 769 | 779 | 7226           |

**Supplemental Table 2.** Number of collisions analyzed at every combination of ten fiber-like micropattern widths and five TGF $\beta$  treatment conditions.

#### 4. Statistical analysis of sliding response

Two-way ANOVA was performed to test the null hypothesis that fraction sliding does not depend on either TGF $\beta$  treatment or the width of the fiber-like micropattern (data shown in Figure 3A). The analysis was performed using statistical analysis software R (v3.3.1) and shows that fraction sliding exhibits a statistically significant dependence on TGF $\beta$  treatment ( $p < 2e-16$ ) and line width ( $p < 2e-16$ ). The interaction between these factors is significant ( $p < 0.05$ ); therefore, we conducted detailed analysis of simple effects by 1-way ANOVA, with the Sidak-Bonferroni correction for familywise error. For each TGF $\beta$  treatment condition, including control, the dependence of fraction sliding on line width was statistically significant ( $p < 0.001$ ). Meanwhile, the dependence of fraction sliding on TGF $\beta$  treatment was statistically significant at line widths of 12  $\mu\text{m}$  ( $p < 0.001$ , \*\*\*) and 9, 15, 21, 27 and 33  $\mu\text{m}$  ( $p < 0.05$ , \*). The dependence of fraction sliding on TGF $\beta$  treatment at line widths of 6, 18, 24 and 30  $\mu\text{m}$  were not statistically significant by ANOVA (ns).

#### 5. Characteristic fiber-like dimension (CFD)

We previously defined the CFD as the hypothetical line width required to support moderate sliding (i.e. 25% sliding) on fiber-like micropatterns (20). Here, we applied the same linear model to fraction sliding data for untreated and TGF $\beta$ -treated MCF-10A cells (Supplemental Fig. 3). Increasing the dose and duration of TGF $\beta$  treatment progressively reduced the calculated value of the CFD compared to untreated (control) cells.

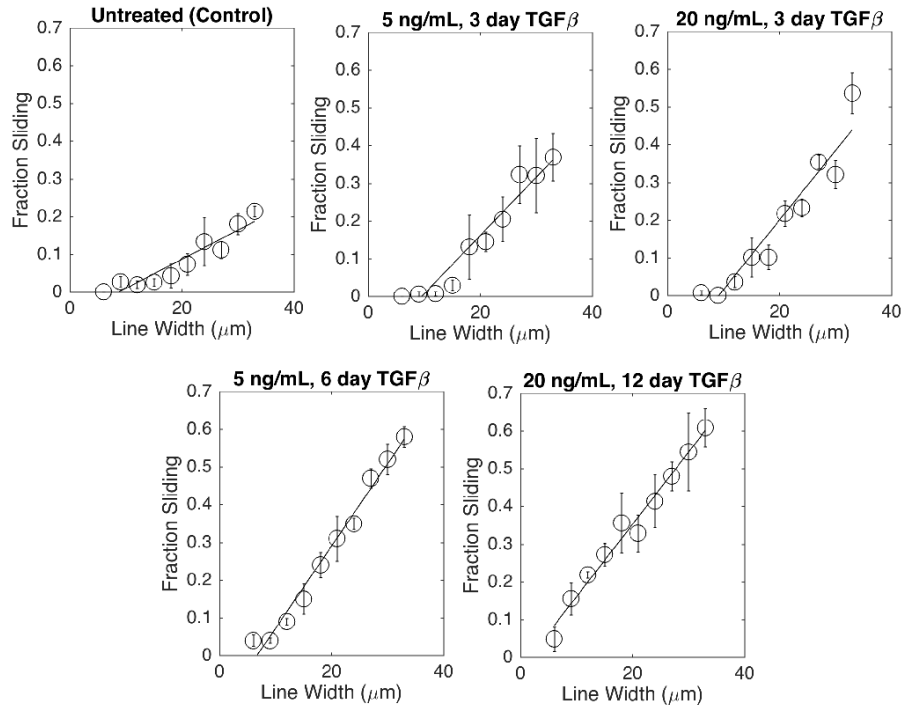

**Supplemental Figure 3.** A simple linear model was applied to fraction sliding data for untreated and TGF $\beta$ -treated MCF-10A cells. The CFD was calculated for each condition by determining the line width required to achieve an intermediate level of sliding.
